# Supplementary material for: Core–shell heterostructured metal oxide arrays enable superior light-harvesting and hysteresis-free mesoscopic perovskite solar cells
Source: Royal Society of Chemistry journal article supplement (doi:10.1039/c5nr02874d), 2015-01-01
Supplement: c5nr02874d1.pdf [file c5nr02874d1.pdf]

# Supporting Information

## for

### Core-Shell Heterostructured Metal Oxide Arrays Enable Superior Light-Harvesting and Hysteresis-Free Mesoscopic Perovskite Solar Cells

*Khalid Mahmood, Bhabani Sankar Swain and Aram Amassian*

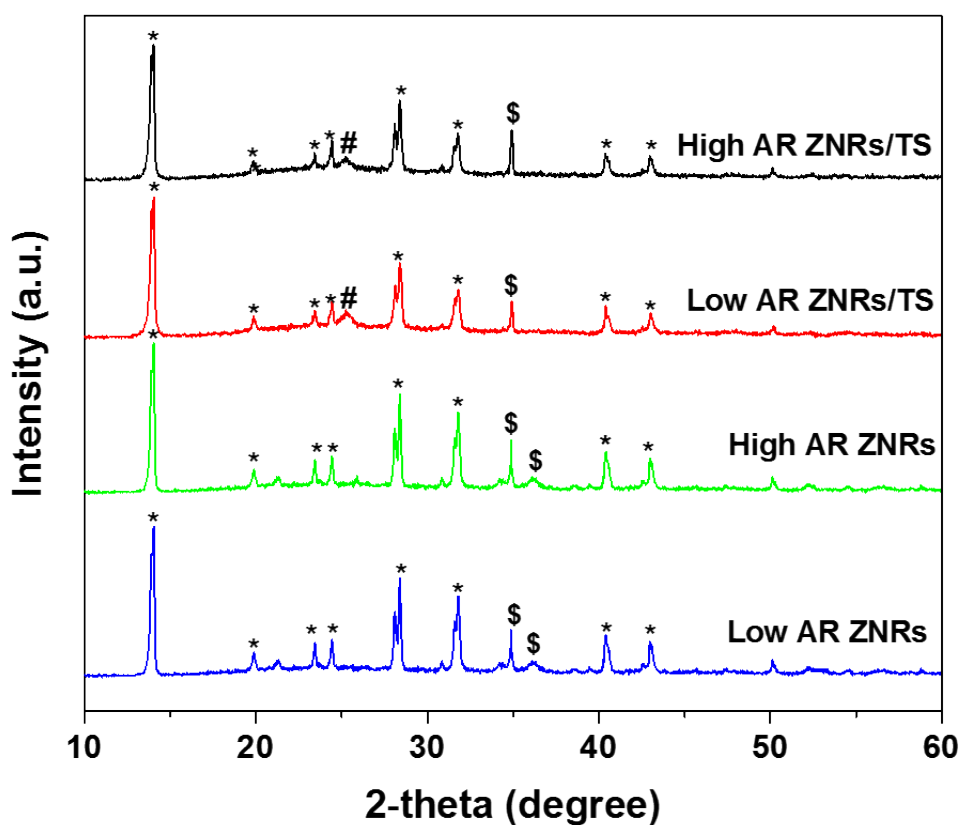

Figure S1. XRD patterns of perovskite coated four different ETMs. Peaks related to the ZnO, TiO<sub>2</sub> and perovskite are marked (\$ is for ZnO, # is for TiO<sub>2</sub> and \* is for perovskite structure).

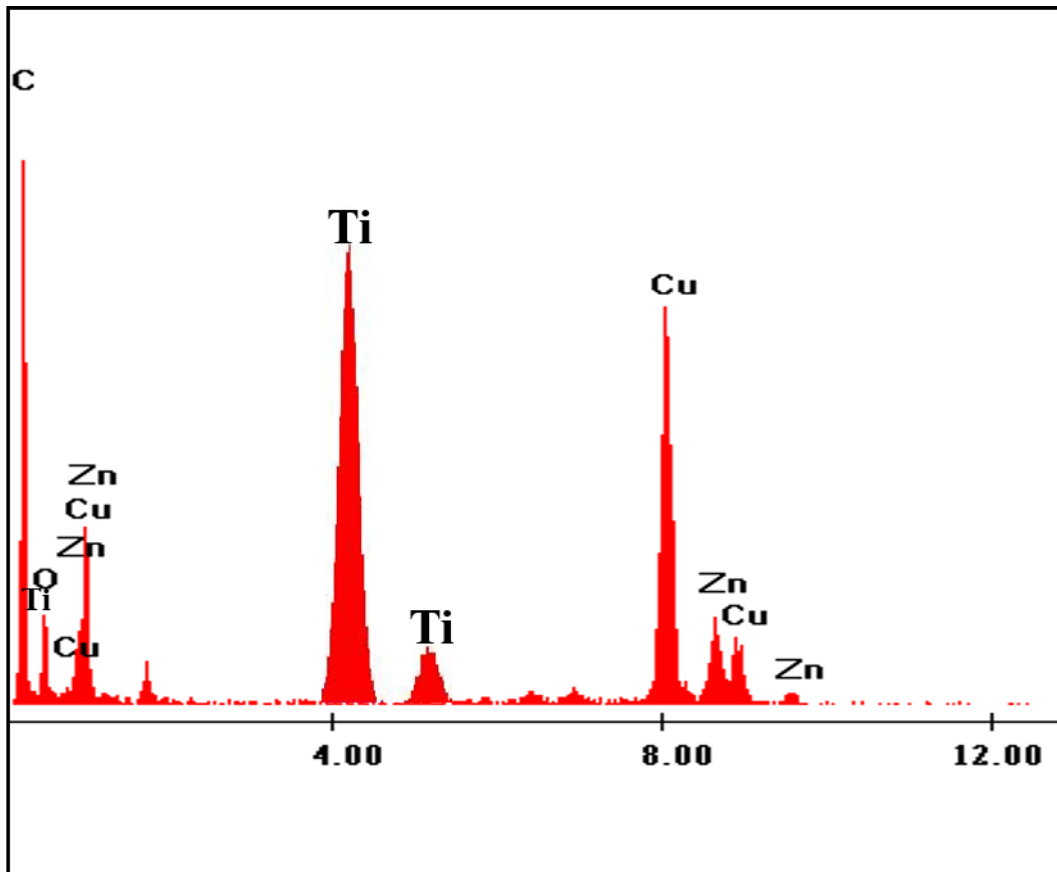

Figure S2. EDS spectrum collected from the area indicated by a circular shape for high AR ZNRs/TS heterostructured hybrid ETM, respectively.
